# Supplementary material for: The FuGas 2.1 framework for atmosphere-ocean coupling ingeoscientific models: improving estimates of the solubilities andfluxes of greenhouse gases and aerosols
Source: Copernicus journal article supplement (doi:10.5194/gmd-2016-273), 2016-11-23
Supplement: Supplementary file 2 [file gmd-2016-273-supplement.zip]

Archive with 22 entries (22 files):
- estimateka.m
- estimatekbubble.m
- estimatekbubble_mp.m
- estimatekcurrent.m
- estimatekH.m
- estimatekw.m
- estimatekwind.m
- estimatekwind_mp.m
- estimateMOS.m
- estimateMOS_mp.m
- estimateRib.m
- estimateRib_mp.m
- estimateSca.m
- estimatez0.m
- estimatez0_mp.m
- Field_validation.mat
- GasFluxExe_field.m
- GasFluxExe_mp.m
- getKfromEC.m
- RunDDF.m
- Tutorial.pdf
- UnitConverter.m
