# Supplementary material for: The FuGas 2.1 framework for atmosphere-ocean coupling ingeoscientific models: improving estimates of the solubilities andfluxes of greenhouse gases and aerosols
Source: Copernicus journal article supplement (doi:10.5194/gmd-2016-273), 2016-11-23
Supplement: Supplementary file 2 [file gmd-2016-273-supplement.zip › estimatekcurrent.m]

%TASK: estimates the water-side transfer velocity term dependent from 
%water current (w) and depth (z).

%CALCULUS:-----------------------------------------------------------------

function [kcurrent] = estimatekcurrent(w,zw,NSkcurrent)

%--------------------------------------------------------------------------

switch NSkcurrent
    case 'OCD58'   %O'Connor & Dobbins (1958)
kcurrent=1.719*sqrt(w./zw);                                          %cm/h
end
