# Supplementary material for: The FuGas 2.1 framework for atmosphere-ocean coupling ingeoscientific models: improving estimates of the solubilities andfluxes of greenhouse gases and aerosols
Source: Copernicus journal article supplement (doi:10.5194/gmd-2016-273), 2016-11-23
Supplement: Supplementary file 2 [file gmd-2016-273-supplement.zip › estimatez0.m]

%TASK: estimate roughness length from wave field height and wave length

%CALCULUS:-----------------------------------------------------------------

function z0 = estimatez0(z0,Hs,Lp,Aw,Bw)

% following Taylor and Yelland (2001)--------------------------------------
if numel(z0)==1
    z0   = nan(size(Hs));
else
    z0   = z0;
end
ir       = find(isnan(z0)==1 & isnan(Hs)==0 & isnan(Lp)==0);
z0(ir)   = Aw*Hs(ir).*(Hs(ir)./(Lp(ir))).^Bw;                            %m
